# Supplementary material for: Phylogeography, mitochondrial DNA diversity, and demographic history of geladas (Theropithecus gelada)
Source: PubMed Central journal article supplement (PMC6107150; doi:10.1371/journal.pone.0202303), 2018-08-23
Supplement: pone.0202303.s002.pdf [file pone.0202303.s002.pdf]

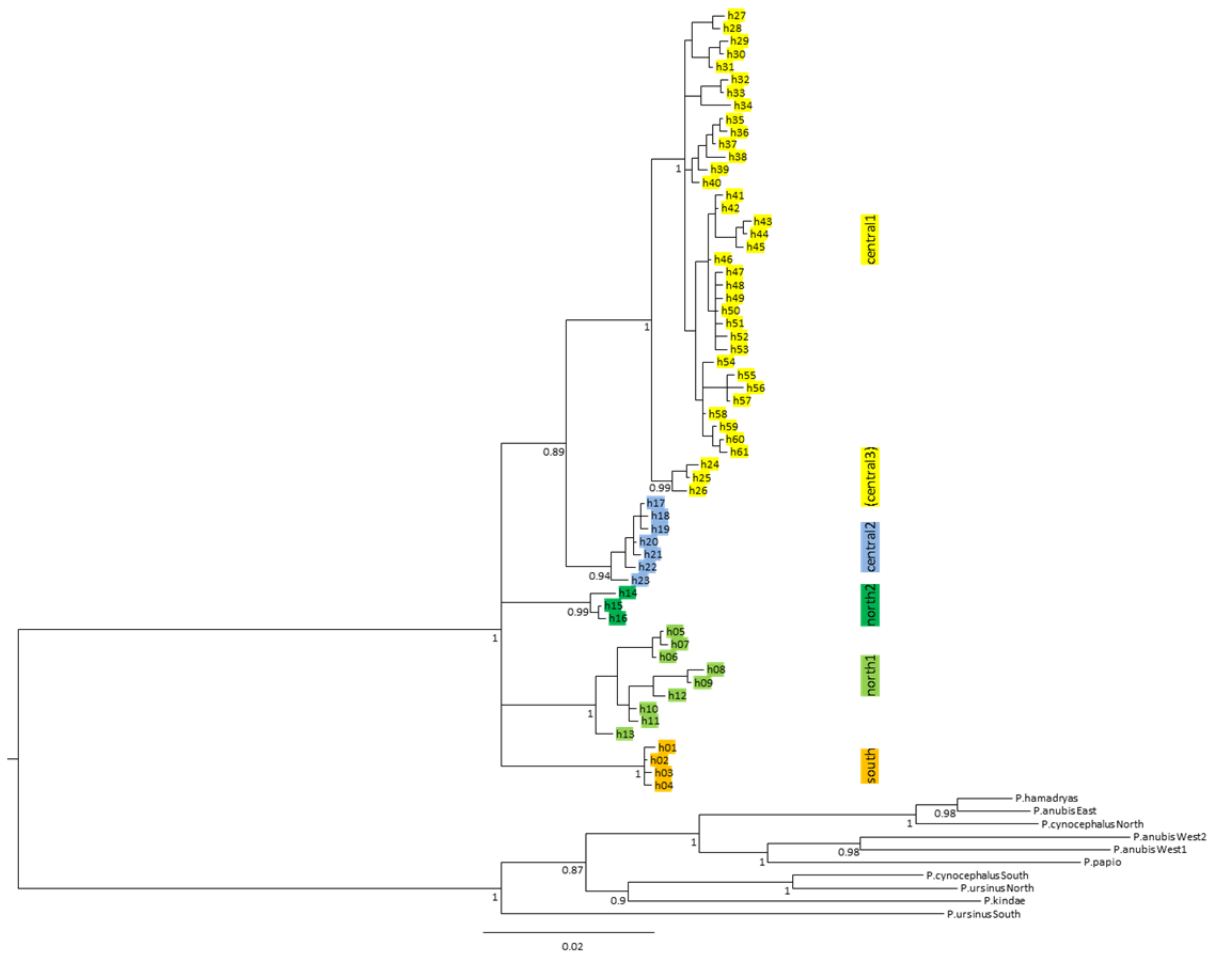

**S2 Fig. Bayesian tree showing phylogenetic relationships among gelada and baboon haplotypes.** Numbers at nodes refer to posterior probabilities.
