# Supplementary material for: Phylogeography, mitochondrial DNA diversity, and demographic history of geladas (Theropithecus gelada)
Source: PubMed Central journal article supplement (PMC6107150; doi:10.1371/journal.pone.0202303), 2018-08-23
Supplement: pone.0202303.s004.pdf [file pone.0202303.s004.pdf]

**S2 Table. Best-fit models for protein-coding and non-protein-coding partitions for various gelada populations as obtained from jModeltest for the Bayesian skyline plots (BSPs)**

| population/clade | protein-coding partition | non-protein-coding partition |
|------------------|--------------------------|------------------------------|
| global           | HKY + I                  | HKY + I + G                  |
| central          | HKY                      | HKY + I                      |
| central-1        | HKY                      | HKY + I                      |
| central-2        | F81                      | F81                          |
| north            | HKY + I                  | HKY + I                      |
| north-1          | HKY                      | HKY + I                      |
| north-2          | HKY                      | F81                          |
| south            | F81                      | F81                          |
