# Supplementary material for: Phylogeography, mitochondrial DNA diversity, and demographic history of geladas (Theropithecus gelada)
Source: PubMed Central journal article supplement (PMC6107150; doi:10.1371/journal.pone.0202303), 2018-08-23
Supplement: pone.0202303.s005.pdf [file pone.0202303.s005.pdf]

**S3 Table. AMOVA results**

| number of clades   | source of variation | df  | ss      | variance components | % variation |
|--------------------|---------------------|-----|---------|---------------------|-------------|
| 3                  | among clades        | 2   | 2006.16 | 23.27               | 78.38       |
| 3                  | within clades       | 159 | 1020.57 | 6.42                | 21.62       |
| 3                  | total               | 161 | 3026.73 | 29.69               |             |
| $F_{ST} = 0.78379$ |                     |     |         |                     |             |
| 4                  | among clades        | 3   | 2131.23 | 24.40               | 81.11       |
| 4                  | within clades       | 158 | 897.93  | 5.68                | 18.89       |
| 4                  | total               | 161 | 3029.16 | 30.08               |             |
| $F_{ST} = 0.81107$ |                     |     |         |                     |             |
| 5                  | among clades        | 4   | 2496.59 | 23.95               | 86.92       |
| 5                  | within clades       | 157 | 565.79  | 3.60                | 13.08       |
| 5                  | total               | 161 | 3062.38 | 27.55               |             |
| $F_{ST} = 0.86921$ |                     |     |         |                     |             |
| 6                  | among clades        | 5   | 2523.71 | 21.86               | 85.52       |
| 6                  | within clades       | 156 | 577.22  | 3.70                | 14.48       |
| 6                  | total               | 161 | 3100.93 | 25.56               |             |
| $F_{ST} = 0.85524$ |                     |     |         |                     |             |
