# Supplementary material for: Phylogeography, mitochondrial DNA diversity, and demographic history of geladas (Theropithecus gelada)
Source: PubMed Central journal article supplement (PMC6107150; doi:10.1371/journal.pone.0202303), 2018-08-23
Supplement: pone.0202303.s006.pdf [file pone.0202303.s006.pdf]

**S4 Table. Selection for the “best” population model**

| number of clades | number of sequences | df | RSS     | AIC     | delta AIC | BIC    | delta BIC |            |
|------------------|---------------------|----|---------|---------|-----------|--------|-----------|------------|
| 3                | 162                 | 2  | 1020.57 | 1950.55 | 91.56     | 308.34 | 85.39     |            |
| 4                | 162                 | 3  | 897.93  | 1931.81 | 72.82     | 292.69 | 69.74     |            |
| 5                | 162                 | 4  | 565.79  | 1858.98 | 0         | 222.95 | 0         | best model |
| 6                | 162                 | 5  | 577.22  | 1864.22 | 5.24      | 231.28 | 8.33      |            |

RSS = error sum of squares (derived from AMOVA)
