# Supplementary material for: Phylogeography, mitochondrial DNA diversity, and demographic history of geladas (Theropithecus gelada)
Source: PubMed Central journal article supplement (PMC6107150; doi:10.1371/journal.pone.0202303), 2018-08-23
Supplement: pone.0202303.s007.pdf [file pone.0202303.s007.pdf]

**S5 Table. Results of the Automatic Barcode Gap Discovery (ABGD) analyses**

| Subst model | Pmin/Pmax | X   | Partition | Prior intraspecific divergence (P) |        |        |        |        |
|-------------|-----------|-----|-----------|------------------------------------|--------|--------|--------|--------|
|             |           |     |           | 0.0010                             | 0.0017 | 0.0028 | 0.0046 | 0.0077 |
| JC          | 0.001/0.1 | 1.5 | Initial   | 5                                  | 5      | 5      | 5      | 1      |
|             |           |     | Recursive | 9                                  | 5      | 5      | 5      | 1      |
| K2P         | 0.001/0.1 | 1.5 | Initial   | 5                                  | 5      | 5      | 5      | 2      |
|             |           |     | Recursive | 9                                  | 5      | 5      | 5      | 2      |
| simple      | 0.001/0.1 | 1.5 | Initial   | 5                                  | 5      | 5      | 5      | 2      |
|             |           |     | Recursive | 5                                  | 5      | 5      | 5      | 2      |
| JC          | 0.001/0.1 | 1.0 | Initial   | 7                                  | 5      | 5      | 5      | 1      |
|             |           |     | Recursive | 11                                 | 5      | 5      | 5      | 1      |
| K2P         | 0.001/0.1 | 1.0 | Initial   | 12                                 | 5      | 5      | 5      | 2      |
|             |           |     | Recursive | 12                                 | 5      | 5      | 5      | 2      |
| simple      | 0.001/0.1 | 1.0 | Initial   | 5                                  | 5      | 5      | 5      | 2      |
|             |           |     | Recursive | 5                                  | 5      | 5      | 5      | 2      |
