# Supplementary material for: Phylogeography, mitochondrial DNA diversity, and demographic history of geladas (Theropithecus gelada)
Source: PubMed Central journal article supplement (PMC6107150; doi:10.1371/journal.pone.0202303), 2018-08-23
Supplement: pone.0202303.s008.pdf [file pone.0202303.s008.pdf]

**S6 Table. Divergence age estimates (Ma) and respective 95% Highest Posterior Density (HPD) intervals**

| divergence                              | div age | 95% HPD   |
|-----------------------------------------|---------|-----------|
| <i>Papio – Theropithecus</i>            | 4.72    | 4.00-6.21 |
|                                         |         |           |
| south + north clades vs central clades  | 0.67    | 0.42-0.98 |
| south + north-2 clades vs north-1 clade | 0.58    | 0.35-0.85 |
| south clade vs north-2 clade            | 0.54    | 0.31-0.79 |
| central-1 clade vs central-2 clade      | 0.43    | 0.25-0.65 |
|                                         |         |           |
| first split within south clade          | 0.03    | 0.01-0.06 |
| first split within north-1 clade        | 0.07    | 0.02-0.12 |
| first split within north-2 clade        | 0.17    | 0.09-0.27 |
| first split within central-1 clade      | 0.20    | 0.12-0.30 |
| first split within central-2 clade      | 0.10    | 0.04-0.17 |
